# Supplementary material for: Veranderingen in ervaren voedselzekerheid en eetgedrag in Nederland sinds de COVID-19-uitbraak
Source: Springer Nature journal article supplement (doi:10.1007/s12508-021-00311-0), 2021-07-23
Supplement: MOESM1 [file 19388466]

Digitaal aanvullende content behorende bij het artikel *Veranderingen in ervaren voedselzekerheid en eetgedrag in Nederland sinds de COVID-19-uitbraak*

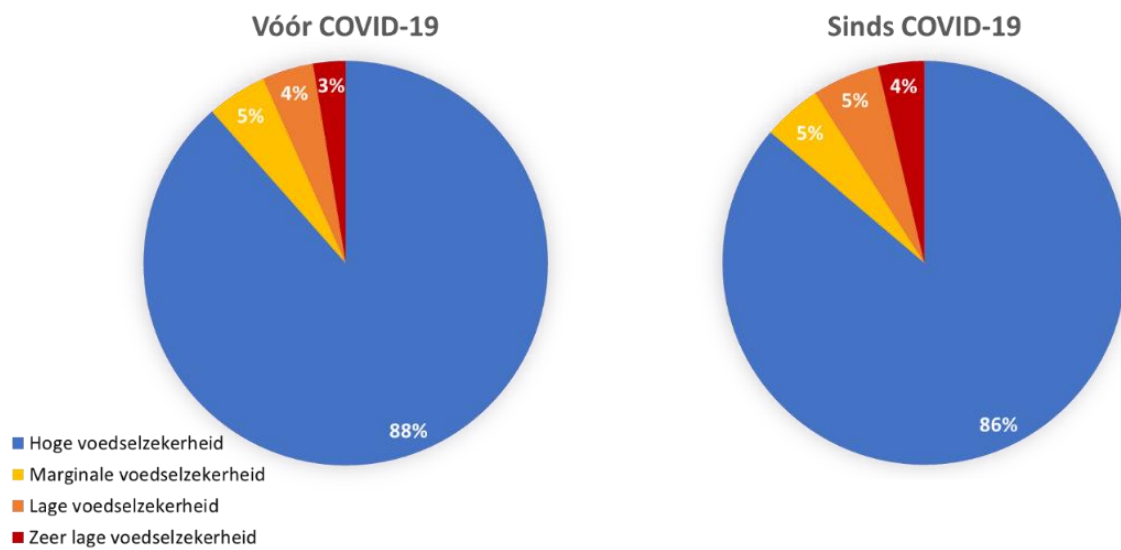

**Aanvullende Figuur 1.** Status van voedselzekerheid vóór en sinds de COVID-19 crisis

**Aanvullende tabel 1.** Vragenlijst over voedselzekerheid die gebruikt is in het huidige onderzoek  
(uitgestuurd in december 2020)

---

**Voedselzekerheid op dit moment (sinds de Corona uitbraak)**

De volgende stellingen gaan over de voedselinname in uw huishouden en of u het eten dat u nodig had, kon betalen. De eerste stellingen gaan over de periode **sinds de Corona uitbraak** (vanaf maart dit jaar).

**Geef aan hoe vaak onderstaande stellingen op u van toepassing zijn.**

**1 In de periode sinds de Corona uitbraak was het eten dat ik (of andere gezinsleden) kocht(en) niet genoeg, en ik (of andere gezinsleden) had(den) geen geld om meer eten te kopen.**

- dit kwam vaak voor
- dit kwam soms voor
- dit kwam nooit voor
- weet ik niet / wil ik niet zeggen

**2 In de periode sinds de Corona uitbraak had ik (of andere gezinsleden) niet genoeg geld om een gezonde maaltijd te eten.**

- dit kwam vaak voor
- dit kwam soms voor
- dit kwam nooit voor
- weet ik niet / wil ik niet zeggen

**3 In de periode sinds de Corona uitbraak heb ik (of andere gezinsleden) wel eens minder gegeten of een maaltijd overgeslagen omdat er niet genoeg geld voor eten was.**

- ja
- nee (→ ga door naar vraag 4)
- weet ik niet / wil ik niet zeggen (→ ga door naar vraag 4)

**3a. Hoe vaak kwam dit in de afgelopen maanden (sinds de Corona uitbraak) voor?**

- (bijna) elke maand
- sommige maanden maar niet elke maand
- 1 of 2 maanden
- weet ik niet / wil ik niet zeggen

**4. In de periode sinds de Corona uitbraak heb ik (of andere gezinsleden) wel eens te weinig gegeten omdat er niet genoeg geld voor eten was.**

- ja
- nee
- weet ik niet / wil ik niet zeggen

**5. In de periode sinds de Corona uitbraak heb ik (of andere gezinsleden) wel eens honger gehad, maar niet gegeten omdat ik (of andere gezinsleden) niet meer eten kon(den) kopen.**

- ja
- nee
- weet ik niet / wil ik niet zeggen

---

## Voedselzekerheid vóór de Corona uitbraak

Nu volgen dezelfde stellingen als die u net heeft beantwoord over voedselzekerheid, maar dan gedurende **de 12 maanden vóór de Corona uitbraak** (de periode tussen maart 2019 en maart 2020).

Geef aan hoe vaak onderstaande stellingen op u van toepassing zijn.

1 In de 12 maanden vóór de Corona uitbraak was het eten dat ik (of andere gezinsleden) kocht(en) niet genoeg, en ik (of andere gezinsleden) had(den) geen geld om meer eten te kopen.

- dit kwam vaak voor
- dit kwam soms voor
- dit kwam nooit voor
- weet ik niet / wil ik niet zeggen

2 In de 12 maanden vóór de Corona uitbraak had ik (of andere gezinsleden) niet genoeg geld om een gezonde maaltijd te eten.

- dit kwam vaak voor
- dit kwam soms voor
- dit kwam nooit voor
- weet ik niet / wil ik niet zeggen

3 In de 12 maanden vóór de Corona uitbraak heb ik (of andere gezinsleden) wel eens minder gegeten of een maaltijd overgeslagen omdat er niet genoeg geld voor eten was.

- ja
- nee (→ ga door naar vraag 4)
- weet ik niet / wil ik niet zeggen (→ ga door naar vraag 4)

3a. Hoe vaak kwam dit in de 12 maanden vóór de Corona uitbraak voor?

- (bijna) elke maand
- sommige maanden maar niet elke maand
- 1 of 2 maanden
- weet ik niet / wil ik niet zeggen

4 In de 12 maanden vóór de Corona uitbraak heb ik (of andere gezinsleden) wel eens te weinig gegeten omdat er niet genoeg geld voor eten was.

- ja
- nee
- weet ik niet / wil ik niet zeggen

5 In de 12 maanden vóór de Corona uitbraak heb ik (of andere gezinsleden) wel eens honger gehad, maar niet gegeten omdat ik (of andere gezinsleden) niet meer eten kon(den) kopen.

- ja
  - nee
  - weet ik niet / wil ik niet zeggen
-

**Aanvullende tabel 2.** Voedingscomponenten met bijbehorende voedingsrichtlijnen, bijdragepercentages en puntenwaardering per component

| Voedings-<br>component  | Voedingsrichtlijnen van de Nederlandse<br>Gezondheidsraad en/of het<br>Voedingscentrum | % bijdrage aan<br>de voedings-<br>component<br>score | Eenheden  | Voedingscomponent score                                                                                                                         |                                                                                            |                                   |
|-------------------------|----------------------------------------------------------------------------------------|------------------------------------------------------|-----------|-------------------------------------------------------------------------------------------------------------------------------------------------|--------------------------------------------------------------------------------------------|-----------------------------------|
|                         |                                                                                        |                                                      |           | 0 punten                                                                                                                                        | 5 punten                                                                                   | 10 punten                         |
| <b>Groenten</b>         | Eet dagelijks ten minste 200 gram groente                                              | 100                                                  | Gram/d    | 0                                                                                                                                               | <i>Continue</i>                                                                            | ≥200                              |
| <b>Fruit</b>            | Eet dagelijks ten minste 200 gram (2 porties) fruit                                    | 100                                                  | Portie/ d | 0                                                                                                                                               | <i>Continue</i>                                                                            | ≥ 2                               |
| <b>Peulvruchten</b>     | Eet wekelijks een portie peulvruchten                                                  | 100                                                  | Gram/w    | 0                                                                                                                                               | <i>Continue</i>                                                                            | ≥ 135                             |
| <b>Ongezouten noten</b> | Eet ten minste 15 gram ongezouten noten per dag                                        | 100                                                  | Gram/d    | 0                                                                                                                                               | <i>Continue</i>                                                                            | ≥ 15                              |
| <b>Vis</b>              | Eet een keer per week vis                                                              | 50                                                   | Portie/w  | 0                                                                                                                                               | <1                                                                                         | ≥ 1                               |
|                         | Bij voorkeur vette vis                                                                 | 50                                                   | -         | Geen vis                                                                                                                                        | Magere of zowel vette als magere vis                                                       | Vooral vette vis                  |
| <b>Graan-producten</b>  | Eet dagelijks ten minste 90 gram volkorenproducten                                     | 50                                                   | Gram/d    | 0                                                                                                                                               | <i>Continue</i>                                                                            | ≥ 90                              |
|                         | Vervang geraffineerde graanproducten door volkorenproducten                            | 50                                                   | -         | Vooral geraffineerde graanproducten                                                                                                             | Zowel geraffineerde als volkoren graanproducten                                            | Vooral volkoren graanproducten    |
| <b>Zuivel</b>           | Eet dagelijks 2-3 porties zuivel                                                       | 50                                                   | Portie/d  | 0                                                                                                                                               | <i>Continue</i>                                                                            | ≥ 2                               |
|                         | Bij voorkeur halfvolle/ magere zuivel                                                  | 50                                                   | -         | Vooral vette zuivel                                                                                                                             | Zowel vette als halfvolle/ magere zuivel                                                   | Vooral halfvolle/ magere zuivel   |
| <b>Thee</b>             | Drink dagelijks 3-4 koppen groene/ zwarte thee                                         | 100                                                  | Portie/d  | <1 EN vooral groene/ zwarte thee;<br><br><3 EN zowel kruidenthee als groene/ zwarte thee;<br><br>Geen thee gedronken;<br><br>Vooral kruidenthee | 1-2 EN vooral groene/ zwarte thee;<br><br>≥ 3 EN zowel kruidenthee als groene/ zwarte thee | ≥ 3 EN vooral groene/ zwarte thee |

|                               |                                                                                                                                                                 |     |                 |                                                                       |                                                 |                                                                     |
|-------------------------------|-----------------------------------------------------------------------------------------------------------------------------------------------------------------|-----|-----------------|-----------------------------------------------------------------------|-------------------------------------------------|---------------------------------------------------------------------|
| <b>Koffie</b>                 | Vervang ongefilterde door gefilterde koffie                                                                                                                     | 100 | -               | Kookkoffie/ Turkse of Griekse koffie; koffie gezet met een cafetière; | Koffie uit automaat*; koffie van cups; espresso | Geen koffie gedronken of filterkoffie, koffie van pads, oploskoffie |
| <b>Oliën en vetten</b>        | Vervang boter, harde margarine en bak- en braadvetten door zachte margarine, vloeibaar bak- en braadvet en plantaardige oliën                                   | 50  |                 | Boter, harde margarine                                                |                                                 | Vloeibaar bak- en braadvet, plantaardige oliën                      |
|                               |                                                                                                                                                                 | 50  | -               | Boter op brood of brood wordt niet besmeerd                           | Halfvolle boter of harde margarine op brood     | Zachte margarine op brood                                           |
| <b>Suikerhoudende dranken</b> | Drink zo min mogelijk suikerhoudende dranken                                                                                                                    | 100 | Portie/d        | ≥ 1                                                                   | <1                                              | 0                                                                   |
| <b>Hartige snacks</b>         | Voor producten buiten de Schijf van vijf: kies niet vaker dan 3-5 keer per dag iets uit de dagkeuzes, en niet vaker dan 3 keer per week iets uit de weekkeuzes. | 50  | Grote portie/w  | ≥ 3                                                                   | <1 to 2                                         | 0                                                                   |
|                               |                                                                                                                                                                 | 50  | Kleine portie/d | > 3                                                                   | <i>Continue</i>                                 | 0                                                                   |
| <b>Zoete snacks</b>           | Voor producten buiten de Schijf van vijf: kies niet vaker dan 3-5 keer per dag iets uit de dagkeuzes, en niet vaker dan 3 keer per week iets uit de weekkeuzes. | 100 | Portie/w        | ≥ 3                                                                   | <1 to 2                                         | 0                                                                   |

Afkortingen: d=dag; w=week; \*Koffie uit een automaat kan zowel gefilterde als ongefilterde koffie zijn. Aangezien het in de koffieautomaat gebruikte filter niet bekend is, wordt aangenomen dat het cafestolgehalte matig is.

**Aanvullende tabel 3.** Bevestigende antwoorden op de stellingen betreffende voedselzekerheid, vóór en sinds de COVID-19 crisis

| Stellingen over ervaren voedselzekerheid                                                                                                     | Vóór COVID-19 crisis         | Sinds COVID-19 crisis        |
|----------------------------------------------------------------------------------------------------------------------------------------------|------------------------------|------------------------------|
|                                                                                                                                              | n (%) bevestigend geantwoord | n (%) bevestigend geantwoord |
| Het eten dat ik (of andere gezinsleden) kocht(en) was niet genoeg, en ik (of andere gezinsleden) had(den) geen geld om meer eten te kopen.   | 67 (6,5)                     | 94 (9,1)                     |
| Ik (of andere gezinsleden) had(den) niet genoeg geld om een gezonde maaltijd te eten.                                                        | 106 (10,3)                   | 125 (12,1)                   |
| Ik (of andere gezinsleden) heb(ben) wel eens minder gegeten of een maaltijd overgeslagen omdat er niet genoeg geld voor eten was.            | 39 (3,8)                     | 53 (5,1)                     |
| Hoe vaak kwam dit voor: sommige maanden of vaker?                                                                                            | 34 (87,2) van de 39*         | 43 (81,1) van de 53*         |
| Ik (of andere gezinsleden) heb(ben) wel eens te weinig gegeten omdat er niet genoeg geld voor eten was.                                      | 47 (4,5)                     | 63 (6,1)                     |
| Ik (of andere gezinsleden) heb(ben) wel eens honger gehad, maar niet gegeten omdat ik (of andere gezinsleden) niet meer eten kon(den) kopen. | 26 (2,5)                     | 31 (3,0)                     |

\*Het aantal en percentage deelnemers dat aangeeft dat zij sommige maanden of vaker "minder gegeten hebben of een maaltijd overgeslagen omdat er niet genoeg geld voor eten was"
